# Supplementary material for: The RNA N6-Methyladenosine Methyltransferase METTL3 Promotes the Progression of Kidney Cancer via N6-Methyladenosine-Dependent Translational Enhancement of ABCD1
Source: Front Cell Dev Biol. 2021 Sep 23;9:737498. doi: 10.3389/fcell.2021.737498 (PMC8496489; doi:10.3389/fcell.2021.737498)
Supplement: Supplementary Table 3 — MeRIP-seq statistics in this work. [file Table_3.XLSX]

## Sheet: Sheet1
MeRIP-seq statistics
Group		Total reads	Mapping rate	Uniquely mapped reads
Patient1-N	Input	26946092	0.7167	37198774
	IP	23447573	0.7686	25849392
Patient1-T	Input	29728714	0.8378	48305316
	IP	22829975	0.8779	32344836
Patient2-N	Input	31237502	0.7418	43790429
	IP	32559854	0.7507	40160530
Patient2-T	Input	33770769	0.904	56875739
	IP	26486548	0.8971	38787912
A498-shCon rep1	Input	64434815	0.8663	59892382
	IP	118056314	0.7112	84525026
A498-shCon rep2	Input	62382268	0.8163	50994444
	IP	128348577	0.6956	85970699
A498-shMETTL3 rep1	Input	62014175	0.8691	56980038
	IP	99949409	0.6945	67688143
A498-shMETTL3 rep2	Input	63076487	0.8396	53973158
	IP	142414896	0.6618	95902207

## Sheet: Sheet2
107784368	26946092	53892184	37198774	0.690244
93790292	23447573	46895146	25849392
118914856	29728714	59457428	48305316
91319900	22829975	45659950	32344836
124950008	31237502	62475004
130239416	32559854	65119708
135083076	33770769	67541538
105946192	26486548	52973096
